# Supplementary material
Source: PubMed Central journal article supplement (PMC5426059)

# Supplementary FIGURE 1 - Herrera-Abreu et al.

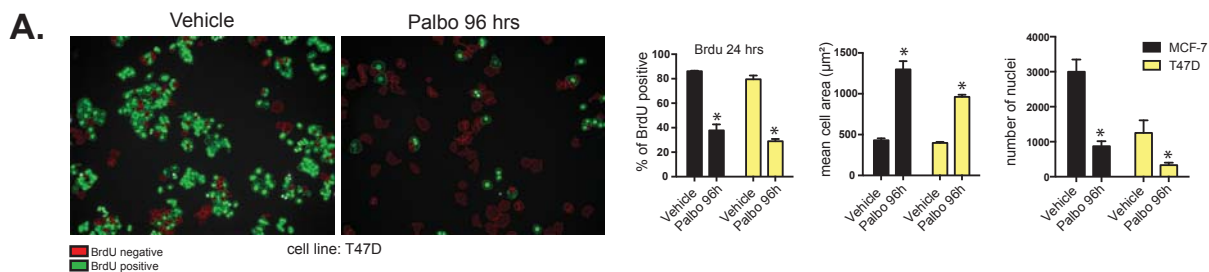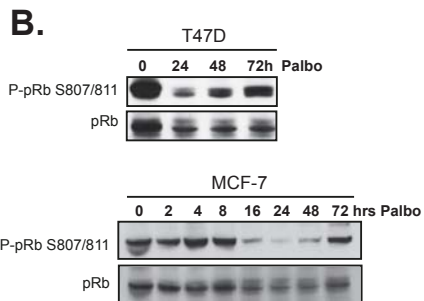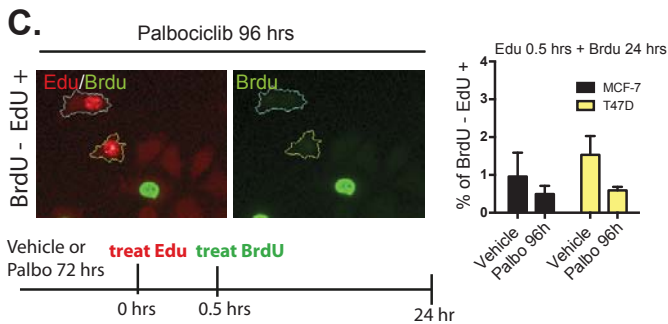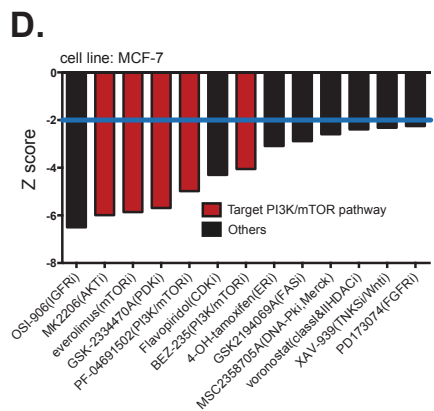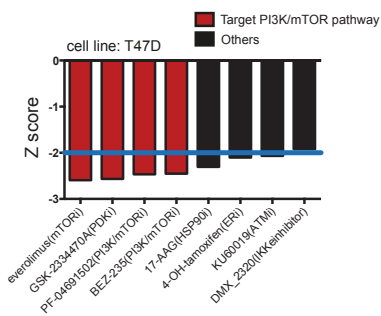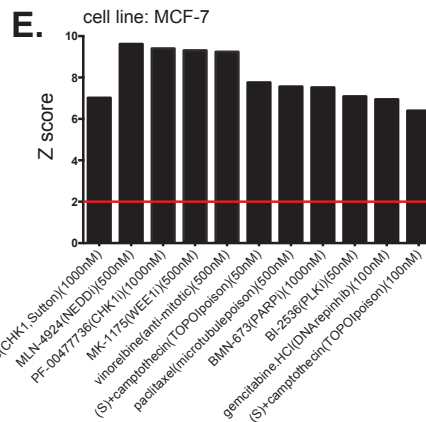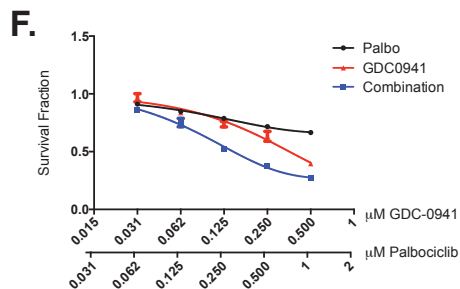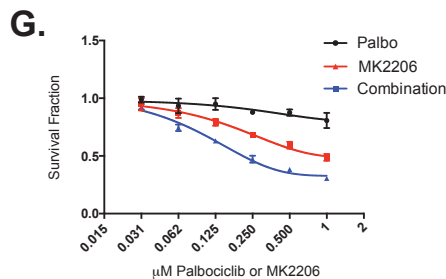

Supplementary FIGURE 2 - Herrera-Abreu et al.

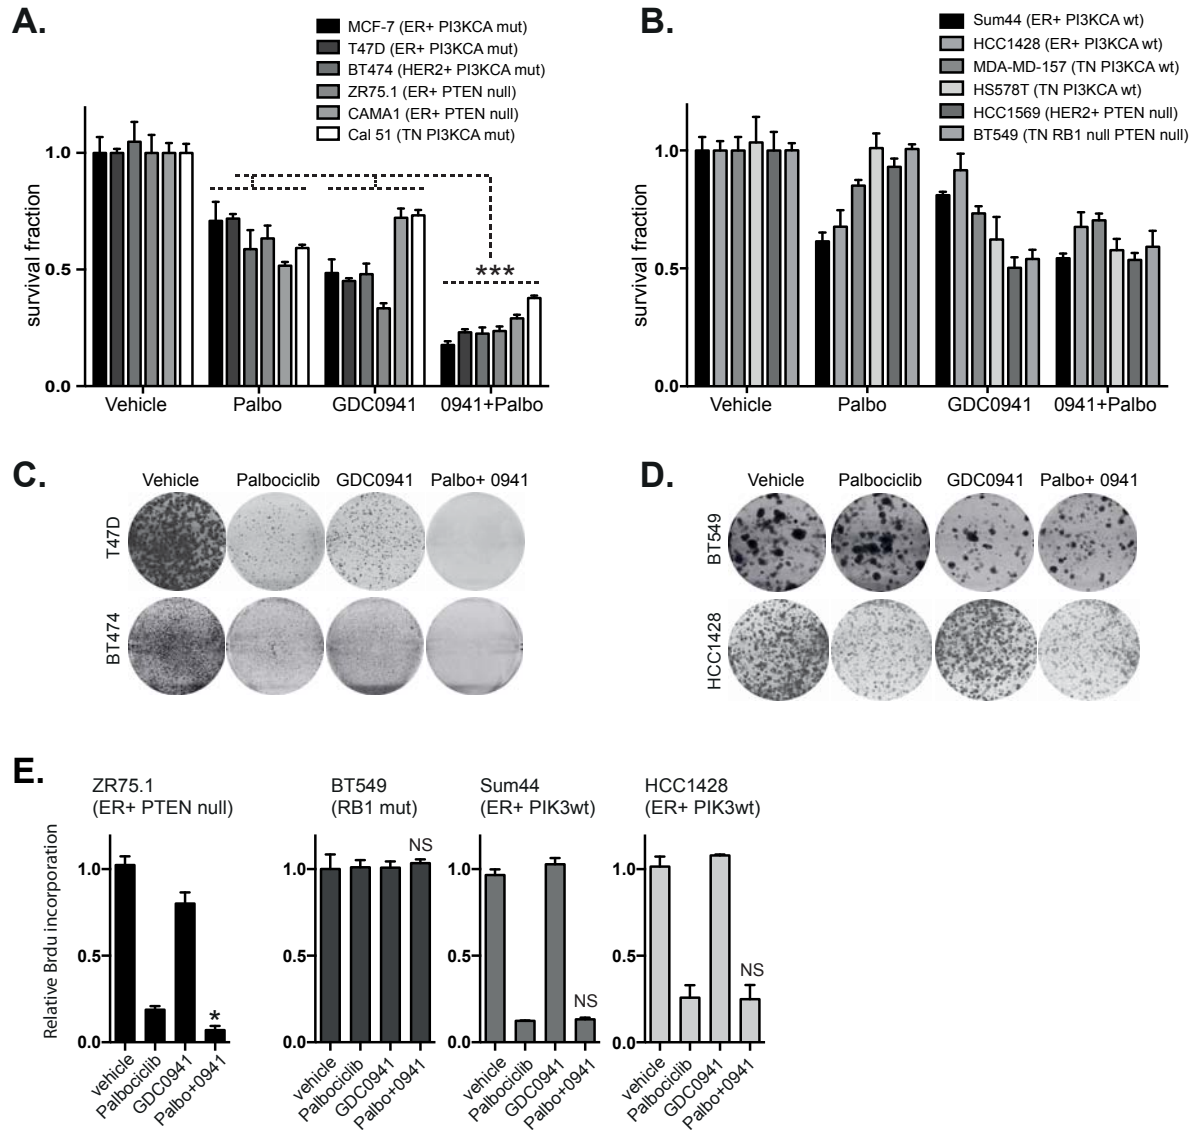

Supplementary FIGURE 3 - Herrera-Abreu et al.

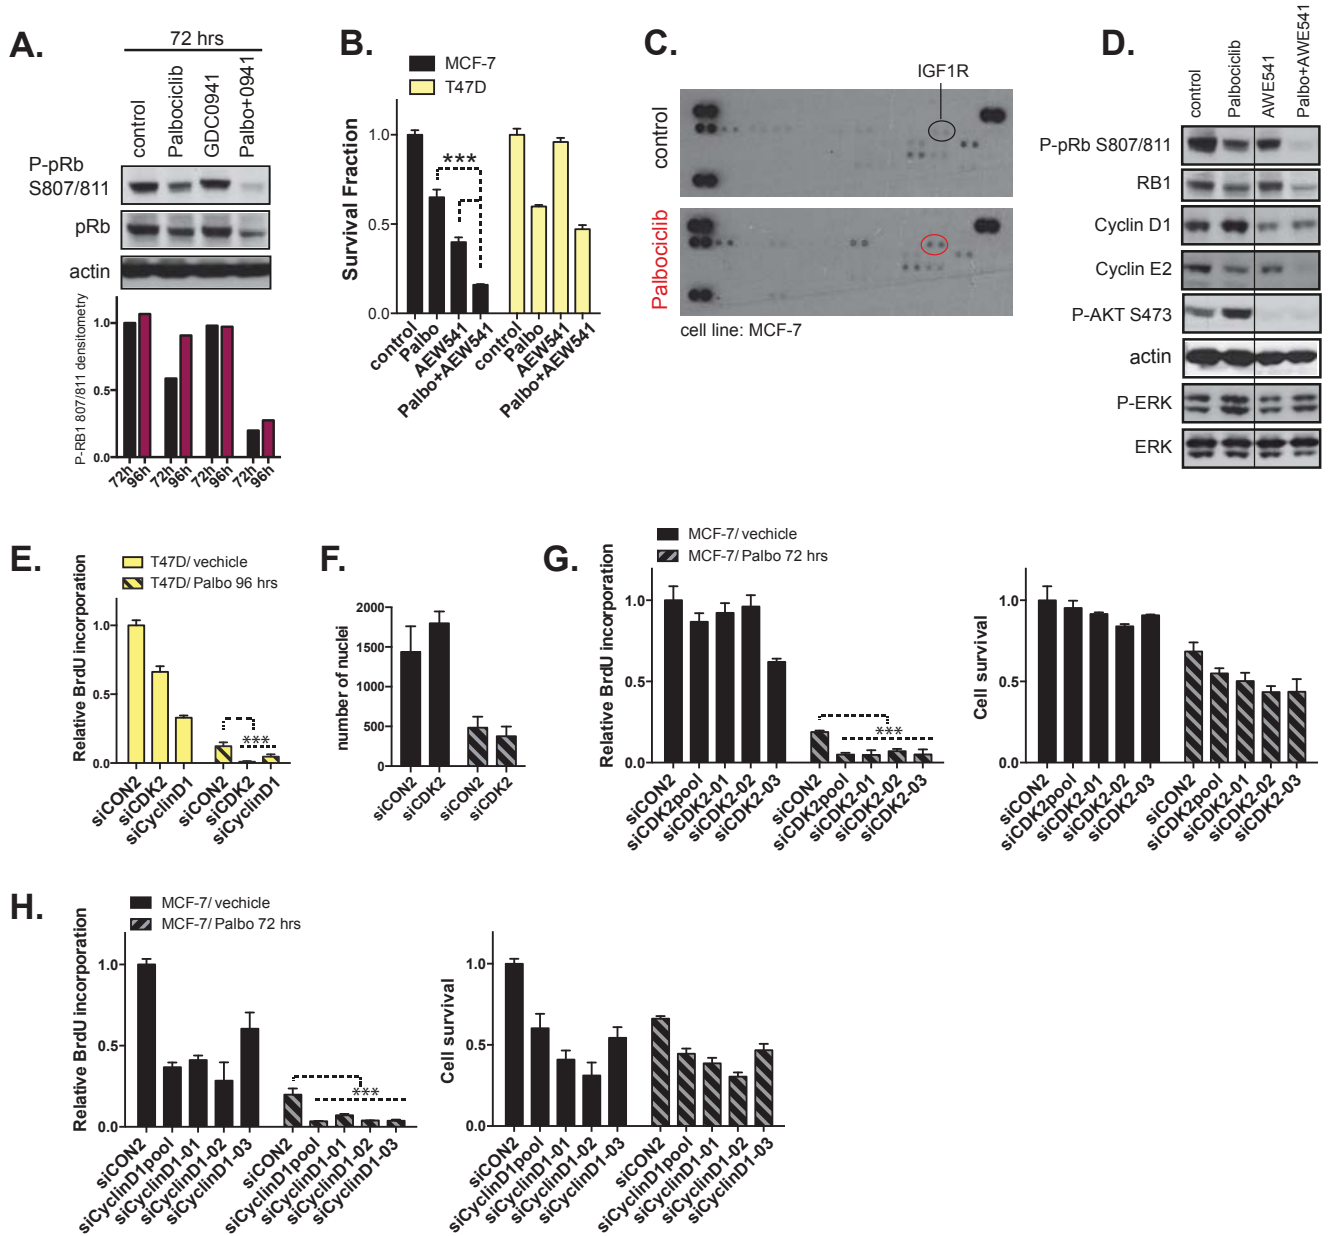

Supplementary Figure 4 - Herrera-Abreu et al.

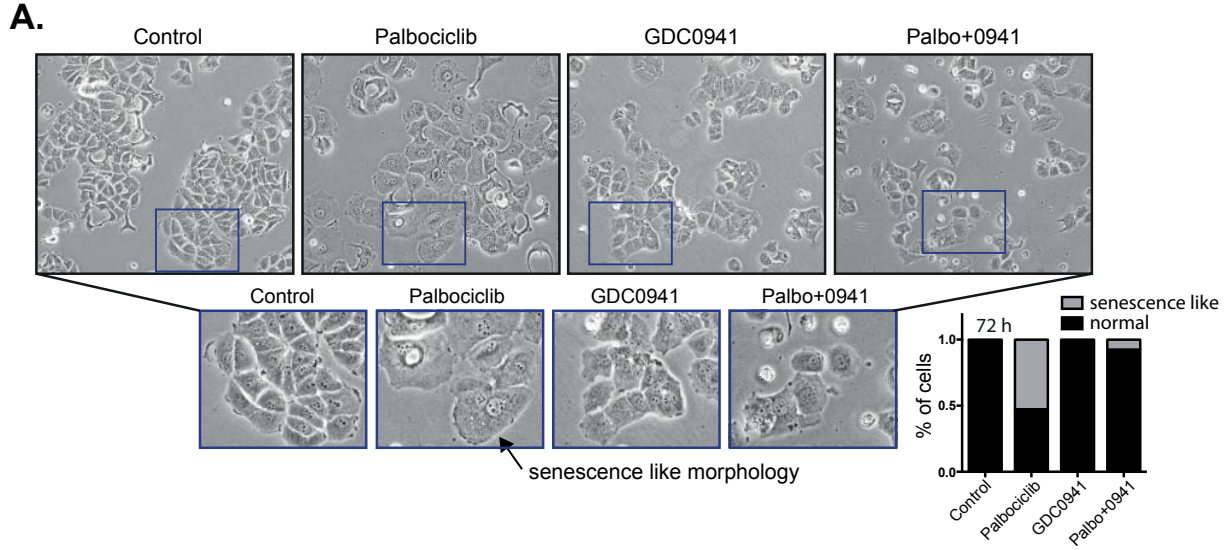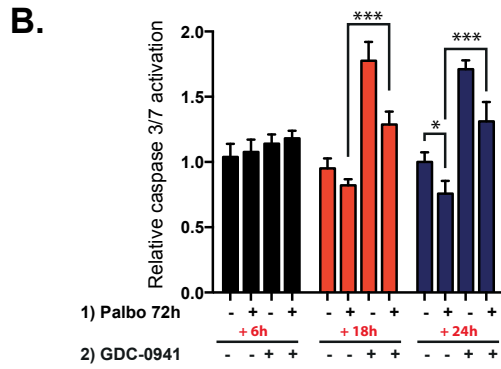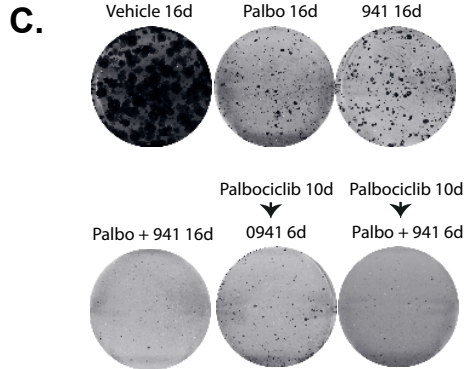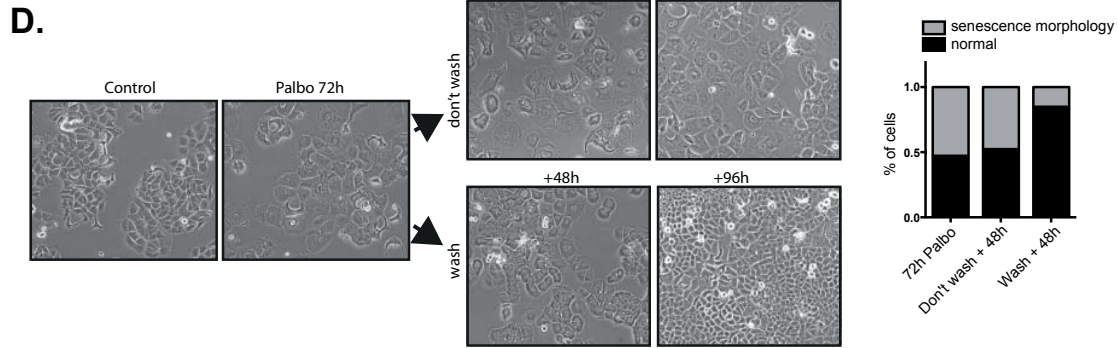

Supplementary FIGURE 5 - Herrera-Abreu et al.

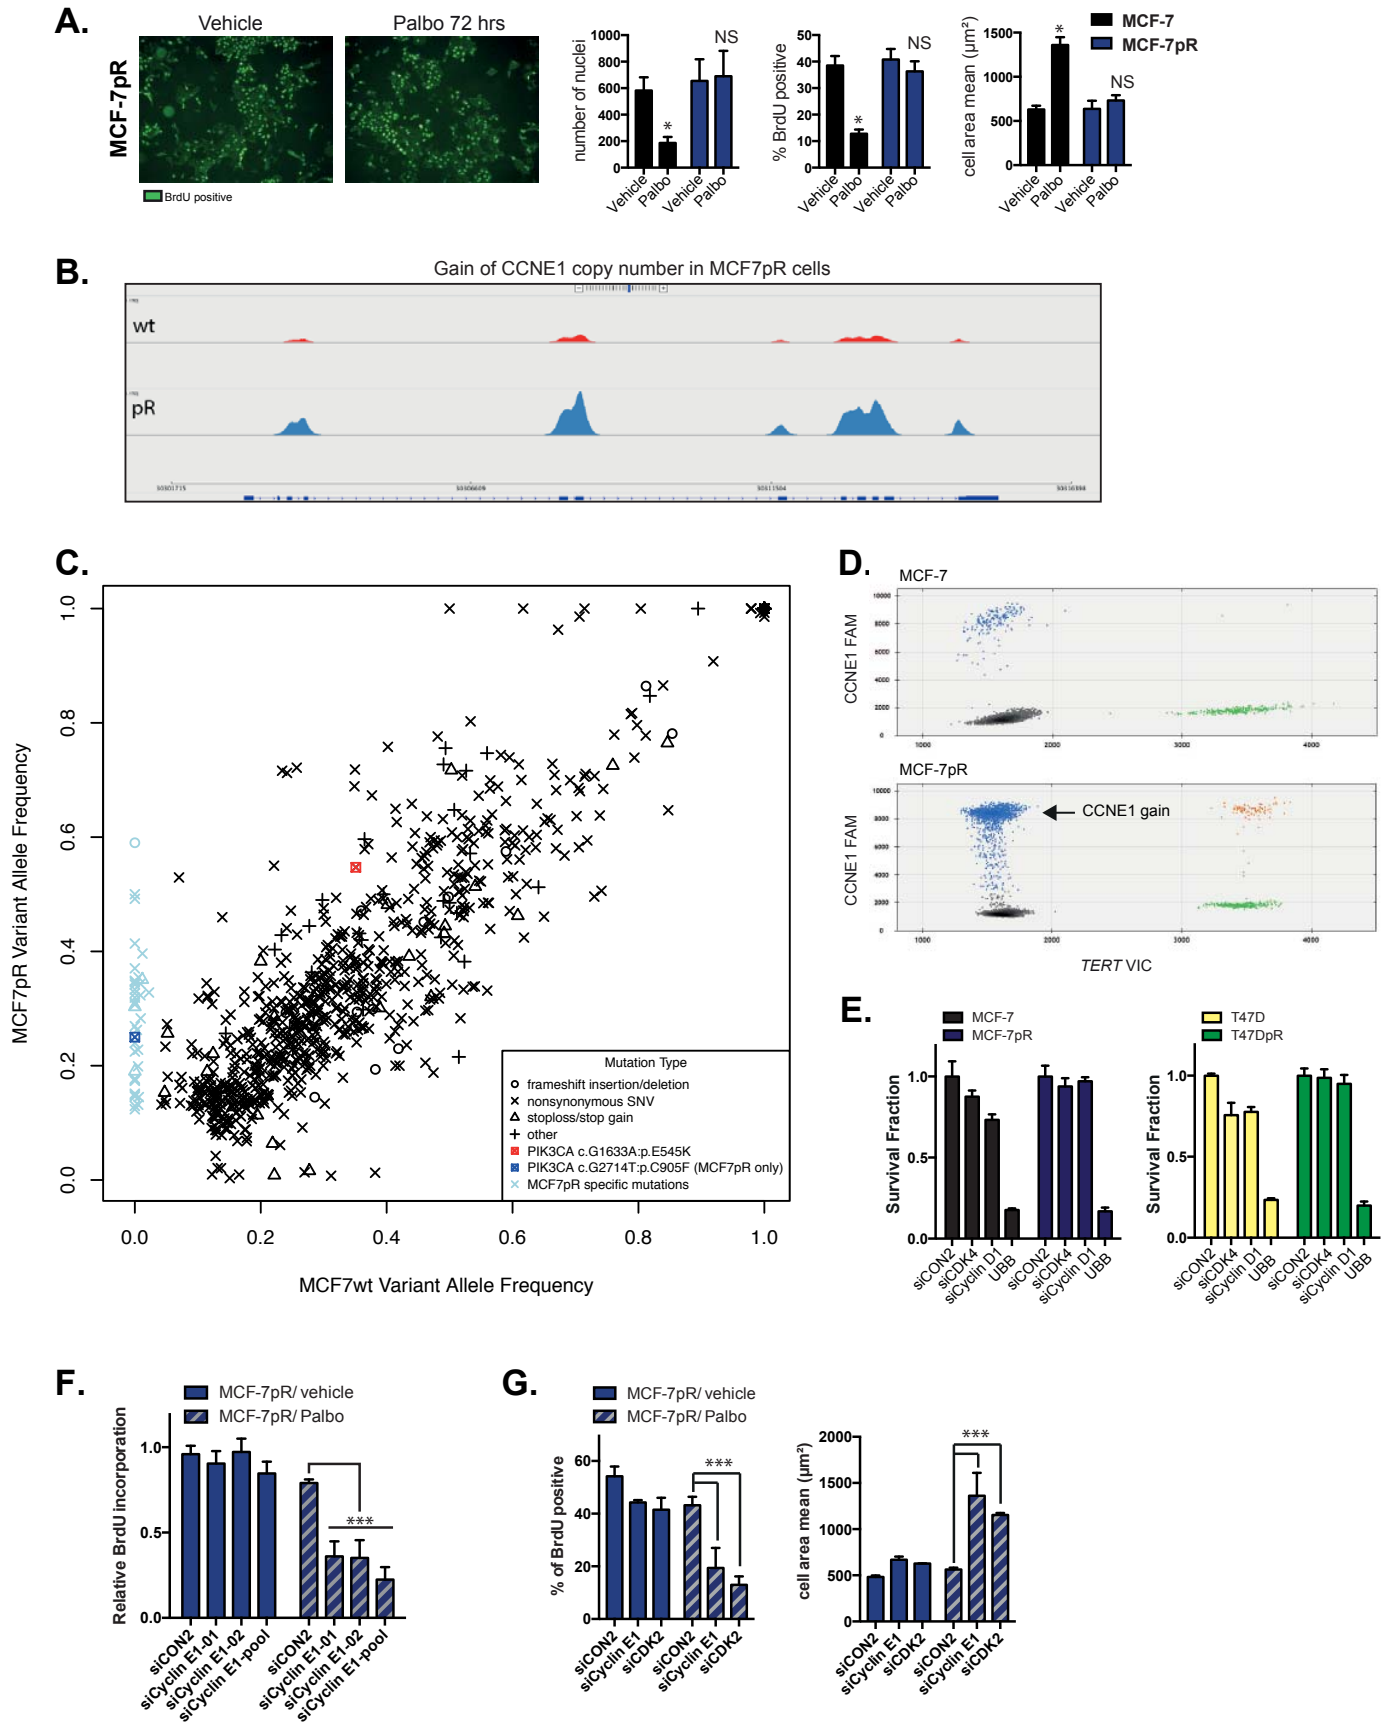

Supplementary FIGURE 6 - Herrera-Abreu et al.

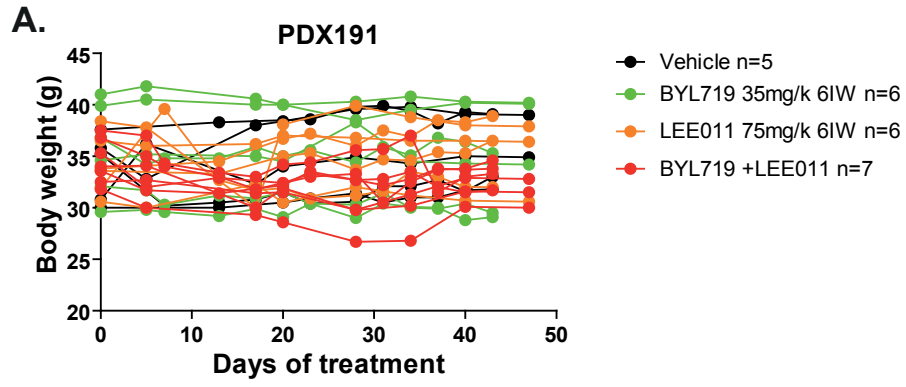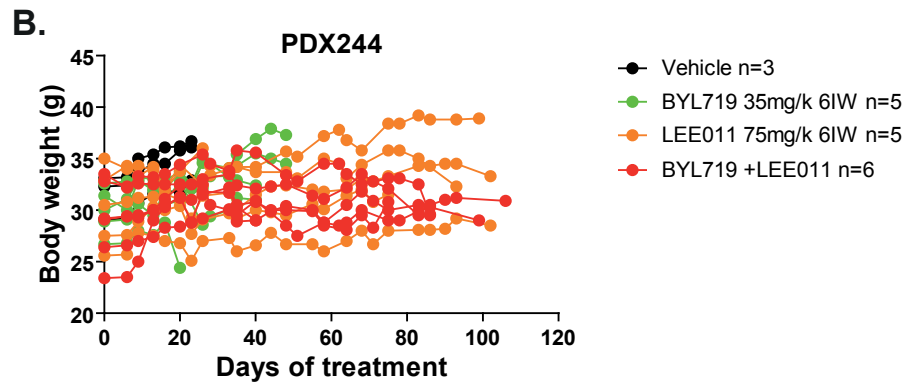

Supplementary FIGURE 7 - Herrera-Abreu et al.

A.

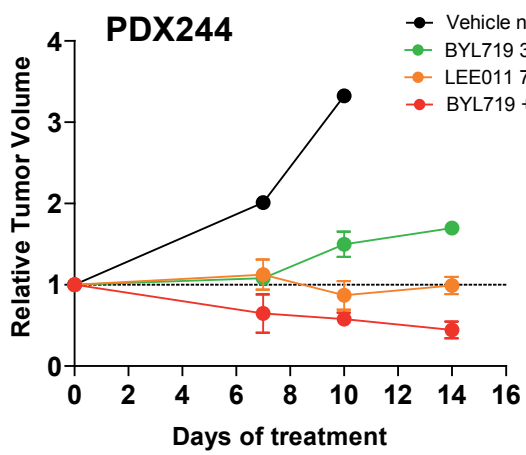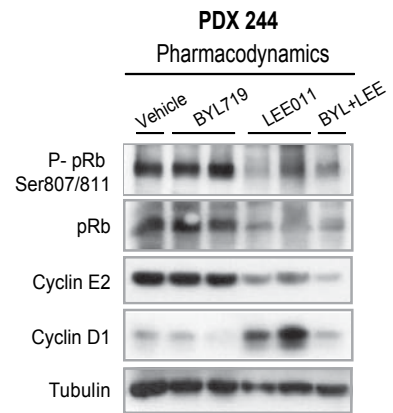

Supplement: NIHMS864302-supplement-Supplementary_Data.pdf [file NIHMS864302-supplement-Supplementary_Data.pdf]
